RESEARCH ARTICLE

# Exendin-4 Inhibits Hepatic Lipogenesis by Increasing $\beta$ -Catenin Signaling

Mi Hae Seo<sup>1</sup>\*, Jinmi Lee<sup>2</sup>\*, Seok-Woo Hong<sup>2</sup>, Eun-Jung Rhee<sup>3</sup>, Se Eun Park<sup>3</sup>, Cheol Young Park<sup>3</sup>, Ki Won Oh<sup>3</sup>, Sung Woo Park<sup>3</sup>, Won-Young Lee<sup>3\*</sup>

**1** Department of Internal Medicine, Soonchunhyang University Gumi Hospital, Gumi, Korea, **2** Institute of Medical Research, Kangbuk Samsung Hospital, Sungkyunkwan University School of Medicine, Seoul, Korea, **3** Department of Internal Medicine, Kangbuk Samsung Hospital, Sungkyunkwan University School of Medicine, Seoul, Korea

\* These authors contributed equally to this work.

\* [drlwy@hanmail.net](mailto:drlwy@hanmail.net)

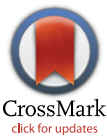

OPEN ACCESS

**Citation:** Seo MH, Lee J, Hong S-W, Rhee E-J, Park SE, Park CY, et al. (2016) Exendin-4 Inhibits Hepatic Lipogenesis by Increasing  $\beta$ -Catenin Signaling. *PLoS ONE* 11(12): e0166913. doi:10.1371/journal.pone.0166913

**Editor:** Catherine Mounier, Universite du Quebec a Montreal, CANADA

**Received:** June 14, 2016

**Accepted:** November 7, 2016

**Published:** December 1, 2016

**Copyright:** © 2016 Seo et al. This is an open access article distributed under the terms of the [Creative Commons Attribution License](https://creativecommons.org/licenses/by/4.0/), which permits unrestricted use, distribution, and reproduction in any medium, provided the original author and source are credited.

**Data Availability Statement:** All relevant data are within the paper and its Supporting Information files.

**Funding:** This study was supported by a grant from the National Research Foundation (NRF), which is funded by the Korean government (NRF-2013R1A1A2063069)(<http://www.nrf.re.kr>), and Samsung Biomedical Research Institute (SBRI) (<http://www.sbri.or.kr>). The funders had no role in the study design, data collection and analysis, decision to publish, or preparation of the manuscript.

## Abstract

The aim of this study is to investigate whether the beneficial effect of exendin-4 on hepatic steatosis is mediated by  $\beta$ -catenin signaling. After the HepG2 human hepatoma cells were treated with PA for 24 hours, total triglycerides levels were increased in a dose-dependent manner, and the expression levels of perilipin family members were upregulated in cells treated with 400  $\mu$ M PA. For our in vitro model of hepatic steatosis, HepG2 cells were treated with 400  $\mu$ M palmitic acid (PA) in the presence or absence of 100 nM exendin-4 for 24 hours. PA increased the expression of lipogenic genes, such as sterol regulatory element-binding protein 1c (SREBP-1c), peroxisome proliferator-activated receptor gamma (PPAR $\gamma$ ), stearoyl-CoA desaturase 1 (SCD1), fatty acid synthase (FAS), and acetyl-CoA carboxylase (ACC) and triglyceride synthesis-involved genes, such as diacylglycerol acyltransferase 1 (DGAT1) and diacylglycerol acyltransferase 2 (DGAT2) in HepG2 cells, whereas exendin-4 treatment significantly prevented the upregulation of SREBP-1c, PPAR $\gamma$ , SCD1, FAS, ACC, DGAT1 and DGAT2. Moreover, exendin-4 treatment increased the expression of phosphorylated glycogen synthase kinase-3 beta (GSK-3 $\beta$ ) in the cytosolic fraction and the expression of  $\beta$ -catenin and transcription factor 4 (TCF4) in the nuclear fraction. In addition, siRNA-mediated inhibition of  $\beta$ -catenin upregulated the expression of lipogenic transcription factors. The protective effects of exendin-4 on intracellular triglyceride content and total triglyceride levels were not observed in cells treated with the  $\beta$ -catenin inhibitor IWR-1. These data suggest that exendin-4 treatment improves hepatic steatosis by inhibiting lipogenesis via activation of Wnt/ $\beta$ -catenin signaling.

## Introduction

Nonalcoholic fatty liver disease (NAFLD) is defined as a spectrum of conditions characterized histologically by hepatic steatosis [1]. The main characteristic of hepatic steatosis is the accumulation of excessive triacylglycerols (TAGs) in hepatocytes [1]. While the precise cellular

**Competing Interests:** The authors have declared that no competing interests exist.

mechanisms driving the development of hepatic steatosis in humans have not yet been fully elucidated, enhanced activity of the lipogenic pathway is likely to contribute to the development of this disease [2]. In particular, the expression of various lipogenic genes (*ACC*/acetyl-CoA carboxylase, *FAS*/fatty acid synthase, *SCD1*/stearoyl-CoA desaturase 1) is coordinated by key transcriptional regulators (*SREBP-1c*, sterol regulatory element binding protein-1c; *ChREBP*, carbohydrate responsive element-binding protein) [3]. Hepatic FFAs derived from three sources, including de novo lipogenesis, plasma free fatty acids or dietary intake, can be re-esterified with glycerol to produce triglyceride and it is stored in lipid droplets.

Exenatide (exendin-4, Ex-4), a glucagon-like peptide-1 (GLP-1) receptor agonist, shares 53% sequence similarity with native GLP-1 [4]. GLP-1R agonists are known to induce multiple signaling pathways intrinsic to  $\beta$ -cell function and hepatic lipogenesis [5,6]. Moreover, exendin-4 has been reported to significantly reduce hepatic steatosis in *ob/ob* mice [7,8]. Gupta *et al.* found that exendin-4 activated important signaling molecules downstream of insulin receptor substrate 1 (IRS-1) in hepatocytes [7]. Furthermore, inhibition of endoplasmic reticulum (ER) stress in obese rodents resulted in decreased *SREBP-1c* activation and lipogenesis, thereby improving hepatic steatosis [9]. Recently, exendin-4 was reported to improve fatty liver disease by increasing the level of sirtuin (SIRT)-1 mediated fibroblast growth factor (FGF)-21 both *in vivo* and *in vitro* [10].

Numerous studies have reported that Wnt signaling is linked to a variety of human diseases, including obesity, type 2 diabetes (T2 DM), and other metabolic diseases [11–14]. Kawai *et al.* showed that Wnt/ $\beta$ -catenin signaling suppresses adipogenesis by inhibiting *C/EBP $\alpha$* -induced *PPAR $\gamma$*  expression [15]. The variant of transcription factor 7-like 2 (*TCF7L2*; also called T-cell factor 4 or TCF 4), a component of the Wnt signaling pathway, is associated with T2 DM in diverse populations [16,17]. Moreover, Liu *et al.* found that GLP-1 agonists activated *TCF7L2*-dependent Wnt signaling in isolated mouse pancreatic islets and induced  $\beta$ -cell proliferation [18]. Another study in skeletal muscle cells reported that the activation of Wnt/ $\beta$ -catenin signaling increased insulin sensitivity through reciprocal regulation of *Wnt10b* and *SREBP-1c* [19].

However, to the best of our knowledge, a role for Wnt/ $\beta$ -catenin signaling in exendin-4-mediated protection against hepatic lipogenesis has not been described. Here we tested the hypothesis that exendin-4-mediated activation of  $\beta$ -catenin signaling plays a crucial role in the inhibition of hepatic lipogenesis.

## Materials and Methods

### Cell culture and pharmacological treatments

The HepG2 and Huh7 human hepatoma cell lines were purchased from American Type Culture Collection (ATCC, Manassas, VA, USA) and Korean Cell Line Bank (KCLB, Seoul, Korea), respectively. Cells were cultured in Dulbecco's modified Eagle's medium (DMEM) (high glucose; Gibco, Grand Island, NY, USA) supplemented with 10% fetal bovine serum and 1% penicillin/streptomycin. The normal mouse hepatocyte cell line (AML12) was purchased from ATCC and was maintained in DMEM/F12 medium (Gibco, Grand Island, NY, USA) supplemented with insulin-transferrin-selenium supplement (100 $\times$ , liquid) (Gibco, Grand Island, NY, USA), 40ng/ml dexamethasone, 10% fetal bovine serum and 1% penicillin/streptomycin. Cells were seeded in 6-well plates at  $2.5 \times 10^5$  cells/well and maintained at 37°C with 5% CO<sub>2</sub>. For the *in vitro* model of hepatic steatosis, HepG2 cells were treated with 200–500  $\mu$ M PA (Sigma-Aldrich). We chose the time-point of 24 hours based on TG content (data not shown). For pharmacological treatments, cells grown in the presence of 400  $\mu$ M PA for 24

hours were treated with or without 100 nM exendin-4 (Sigma-Aldrich) and 10  $\mu$ M IWR-1 ( $\beta$ -catenin inhibitor; Sigma-Aldrich).

### siRNA transfection

For siRNA-mediated gene silencing, Stealth RNAi siRNA duplexes targeting  $\beta$ -catenin (10620319 and 10620318) or Stealth RNAi negative control duplexes (Invitrogen) were transfected into human HepG2 cells using Lipofectamine RNAiMAX transfection reagent (Invitrogen) according to the manufacturer's instructions. Cells were cultured under normal growth conditions (37°C, 5% CO<sub>2</sub>) for 24 hours.

### Quantitative real-time RT-PCR

Total RNA was isolated from cells using Trizol reagent (Invitrogen). Reverse transcription reactions were performed using 2  $\mu$ g total RNA, moloney murine leukemia virus reverse transcriptase (MMLV-RT), and oligo (dT) 12–18 primers (Invitrogen) according to the manufacturer's instructions. Gene expression levels were analyzed by real-time PCR on a Light-Cycler 480 system (Roche, Lewis, UK) using SYBR Green (Roche) and gene-specific primers (Table 1). (Bioneer Co., Daejeon, Korea). Thermocycling parameters included denaturation at 94°C for 15 seconds, annealing at 55°C for 10 seconds, and extension at 72°C for 20 seconds. Results were normalized to  $\beta$ -actin as an internal control and relative expression levels were calculated using the comparative Ct method (2 <sup>$\Delta\Delta$</sup>  Ct).

### Western blotting

Nuclear and cytoplasmic extracts were prepared from liver tissue and cultured cells using a commercially available nuclear extraction kit (Cayman Chemical Co., Ann Arbor, MI, USA). Twenty micrograms of protein was resolved on a 4%-12% Bis-Tris NuPAGE gel and transferred to a polyvinylidene difluoride (PVDF) membrane using an iBlot Transfer Stack (Invitrogen). After protein transfer, the following primary antibodies were used: anti-phospho-GSK-3 $\beta$  (#9323; Cell Signaling Technology, Danvers, MA, USA), anti-GSK-3 $\beta$  (#9315; Cell Signaling Technology, Danvers, MA, USA), anti- $\beta$ -catenin (#9582; Cell Signaling Technology, Danvers, MA, USA), anti-TCF4 (#2569; Cell Signaling Technology), anti-PPAR $\gamma$  (#2443; Cell Signaling Technology), anti-SREBP-1 (sc-366; Santa Cruz Biotechnology, Inc., Santa Cruz, CA, USA), anti- $\beta$ -actin (#4967; Cell Signaling Technology), and anti-Lamin B1 (ab16048;

**Table 1. List of human gene primers used for quantitative PCR.**

| Gene             | Forward sequence (5'→3') | Reverse sequence (5'→3') | Size (bp) |
|------------------|--------------------------|--------------------------|-----------|
| SREBP-1c         | GGCTCCTGCCTACAGCTTCT     | CAGCCAGTGGATCACCACA      | 109       |
| PPAR $\gamma$    | GACCTCAGACAGATTGTCCAC    | AGTCCTTGTAGATCTCCTGC     | 106       |
| SCD1             | CACCACATCTTTCATTGATTGCA  | ATGGCGGCTTGGAGACT        | 75        |
| FAS              | TATGCTTCTTCGTGCAGAGTT    | GCTGCCACACGCTCCTCTAG     | 94        |
| ACC              | CAGAAGTGACAGACTACAGG     | ATCCATGGCTTCCAGGAGTA     | 125       |
| DGAT1            | AACTGGTGTGTGGTGATGCT     | CCTTCAGGAACAGAGAAACC     | 112       |
| DGAT2            | CTACAGGTCATCTCAGTGCT     | GAAGTAGACACAGCGATGA      | 120       |
| $\beta$ -catenin | GCAAGCTCATCATACTGGCT     | CTTGCATTCACCAGCTTCT      | 165       |
| PLIN1            | GATCATGAGACCAGACAGA      | CTGCTACCTCACTGAACCTG     | 92        |
| PLIN2            | ACAGACCATTCTCAGTCCAT     | TATCCAATGCTCCTTTTCCACT   | 141       |
| PLIN3            | GAACAGAGCTACTTCGTACG     | CAGTTTCCATCAGGCTTAGG     | 151       |
| $\beta$ -actin   | TCATGAAGATCCTCACCGAG     | CATCTCTTGCTCGAAGTCCA     | 116       |

doi:10.1371/journal.pone.0166913.t001

Abcam, Cambridge, MA, USA). Membranes were then incubated with horseradish peroxidase-conjugated secondary antibodies. Immunoreactive bands were detected by chemiluminescence (GE Healthcare, Piscataway, NJ, USA).

### Lipid detection

Total TGs were extracted from harvested HepG2 cells. Lipid analysis was carried out with a Serum Triglyceride Determination Kit (TR0100, Sigma-Aldrich Corp.) following the manufacturer's instructions. Protein concentrations were determined with a BCA protein assay kit (Thermo Scientific, Rockford, IL, USA). TG values were normalized to cellular protein contents. Intracellular lipids were visualized by staining with Oil Red O. Briefly, cultured cells were washed 3 times with PBS, fixed in formalin (10%) for 30 min, stained with Oil Red O solution for 1 hour, and washed with distilled water. Images were captured at 400x magnification. To quantitate the intracellular lipid contents, Oil Red O was extracted from each well with 1 ml of isopropanol. Plates were incubated for 5 min, and the resultant absorbances were read spectrophotometrically at 540 nm.

### Statistical analysis

All statistical analyses were performed using PASW Statistics 17 (SPSS, Chicago, IL, USA). Data are presented as means  $\pm$  standard errors. To evaluate the significance of differences between the mean values of different experimental groups, the one-way analysis of variance (ANOVA) test was used. Multiple comparisons between experimental groups were adjusted with the Bonferroni correction. A *p* value  $<0.05$  was considered statistically significant unless otherwise indicated.

## Results

### Palmitic acid induces lipid accumulation in hepatocytes

HepG2 human hepatoma cells were treated with different concentrations of palmitic acid (PA). As shown in [Fig 1A](#), PA treatment increased the levels of intracellular TGs in a dose-dependent manner. We also observed the gene expression of perilipin 1 (PLIN1), perilipin 2 (PLIN2) and perilipin 3 (PLIN3), which are lipid droplet-binding proteins. In cells treated with 400  $\mu$ M PA, the expression of PLIN1 and PLIN2, but not PLIN3, were significantly increased ([Fig 1B](#)). This finding suggests that PA induces steatosis in hepatocytes.

### Exendin-4 inhibits PA-mediated lipogenesis and TG synthesis in hepatocytes

To investigate whether exendin-4 affects the expression of genes related to hepatic lipogenesis, HepG2 cells were pretreated with PA and then incubated with exendin-4. The mRNA expression levels of lipogenesis-associated genes, such as SREBP-1c, PPAR $\gamma$ , SCD1, FAS, and ACC, and fatty acid esterification-associated genes, such as diacylglycerol acyltransferase 1 (DGAT1) and diacylglycerol acyltransferase 2 (DGAT2) were increased in PA-treated cells compared with untreated controls. However, exendin-4 treatment prevented the PA-induced upregulation of SREBP-1c, PPAR $\gamma$ , SCD1, FAS, ACC, DGAT1, and DGAT2 expression ([Fig 2](#)). Therefore, these data suggest that exendin-4 inhibits PA-mediated hepatic lipogenesis and TG synthesis.

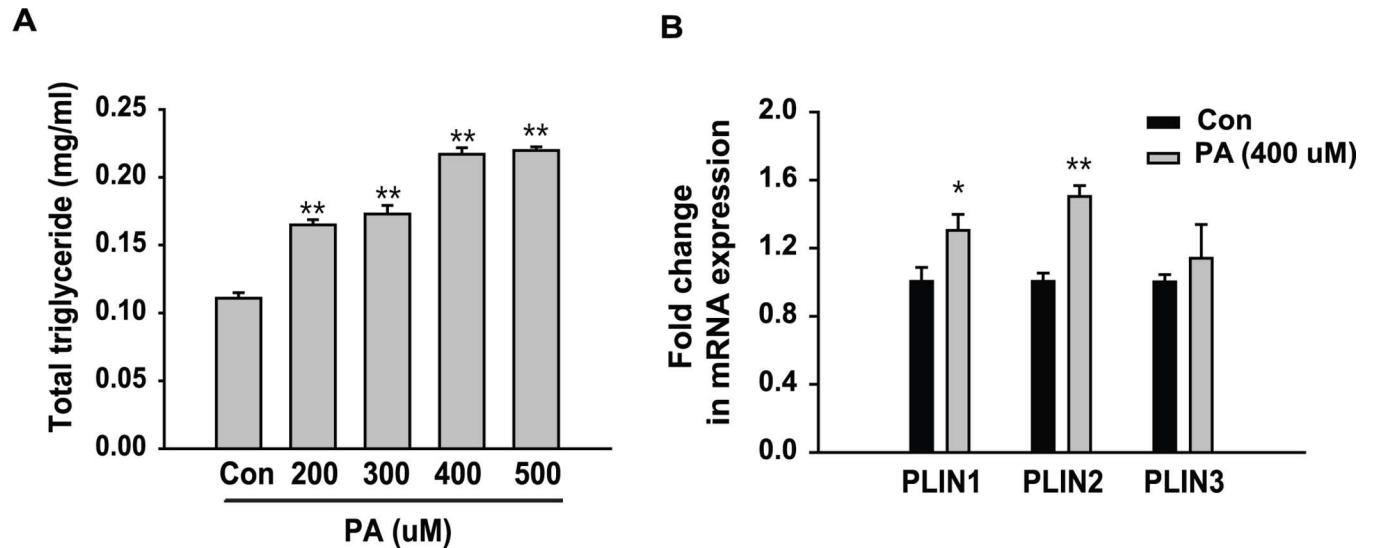

**Fig 1. Palmitic acid stimulates lipid accumulation in hepatocytes.** (A) HepG2 cells were treated with 200–500  $\mu$ M palmitic acid (PA) for 24 hours. Triglycerides were extracted from cultured cells and quantitated by enzymatic assays. Triglyceride levels were normalized to total cellular protein contents. (B) HepG2 cells were treated with 400  $\mu$ M PA for 24 hours. The mRNA expression levels of perilipin 1 (PLIN1), perilipin 2 (PLIN2) and perilipin 3 (PLIN3) were normalized to the level of  $\beta$ -actin. All values are expressed as the mean  $\pm$  SE (n = 6). \* p<0.05, \*\* p<0.01 compared with control cells.

doi:10.1371/journal.pone.0166913.g001

### Exendin-4 promotes $\beta$ -catenin signaling

To investigate whether the actions of exendin-4 were mediated by  $\beta$ -catenin, HepG2, Huh7 and AML12 cells were treated with different concentrations of exendin-4 for 24 hours or were treated with exendin-4 (100 nM) for various time periods. The expression of  $\beta$ -catenin mRNA was increased in a dose-dependent and time-dependent manner by exendin-4 treatment (Fig 3A and 3B). Inactivation of glycogen synthase kinase-3 $\beta$  (GSK-3 $\beta$ ) by phosphorylation enhances nuclear accumulation of beta-catenin [14]. In HepG2 cells, the inactive form of GSK-3 $\beta$ , which is phosphorylated at serine-9, was increased in cells treated with PA+exendin-4 compared with PA-treated cells (Fig 4A). Moreover, the expression levels of nuclear  $\beta$ -catenin and transcription factor 4 (TCF4), a central transcription factor in  $\beta$ -catenin signaling, were decreased in cells treated with PA compared with the respective controls. However, exendin-4 treatment reduced these effects (Fig 4B). Consistently, these effects of exendin-4 were observed also in mouse hepatocytes (S1 Fig).

### $\beta$ -catenin inhibits hepatic lipogenesis

Regulatory effect of  $\beta$ -catenin on the expression of SREBP-1 and PPAR $\gamma$ , two key regulators of *de novo* lipogenesis, was next assessed by western blotting. The expression levels of nuclear SREBP-1 and PPAR $\gamma$  proteins were significantly increased in cells transfected with  $\beta$ -catenin siRNA compared with negative control siRNA-transfected cells (Fig 5). These results suggest that  $\beta$ -catenin could regulate hepatic lipogenesis.

### Exendin-4 reduces PA-induced lipid accumulation in HepG2 cells via $\beta$ -catenin signaling

Lipid accumulation in HepG2 cells was next examined by Oil Red O staining. Compared with untreated cells, PA-treated cells exhibited increased lipid accumulation; however, exendin-4 treatment reduced this increase (Fig 6A). However, in cells pretreated with the  $\beta$ -catenin

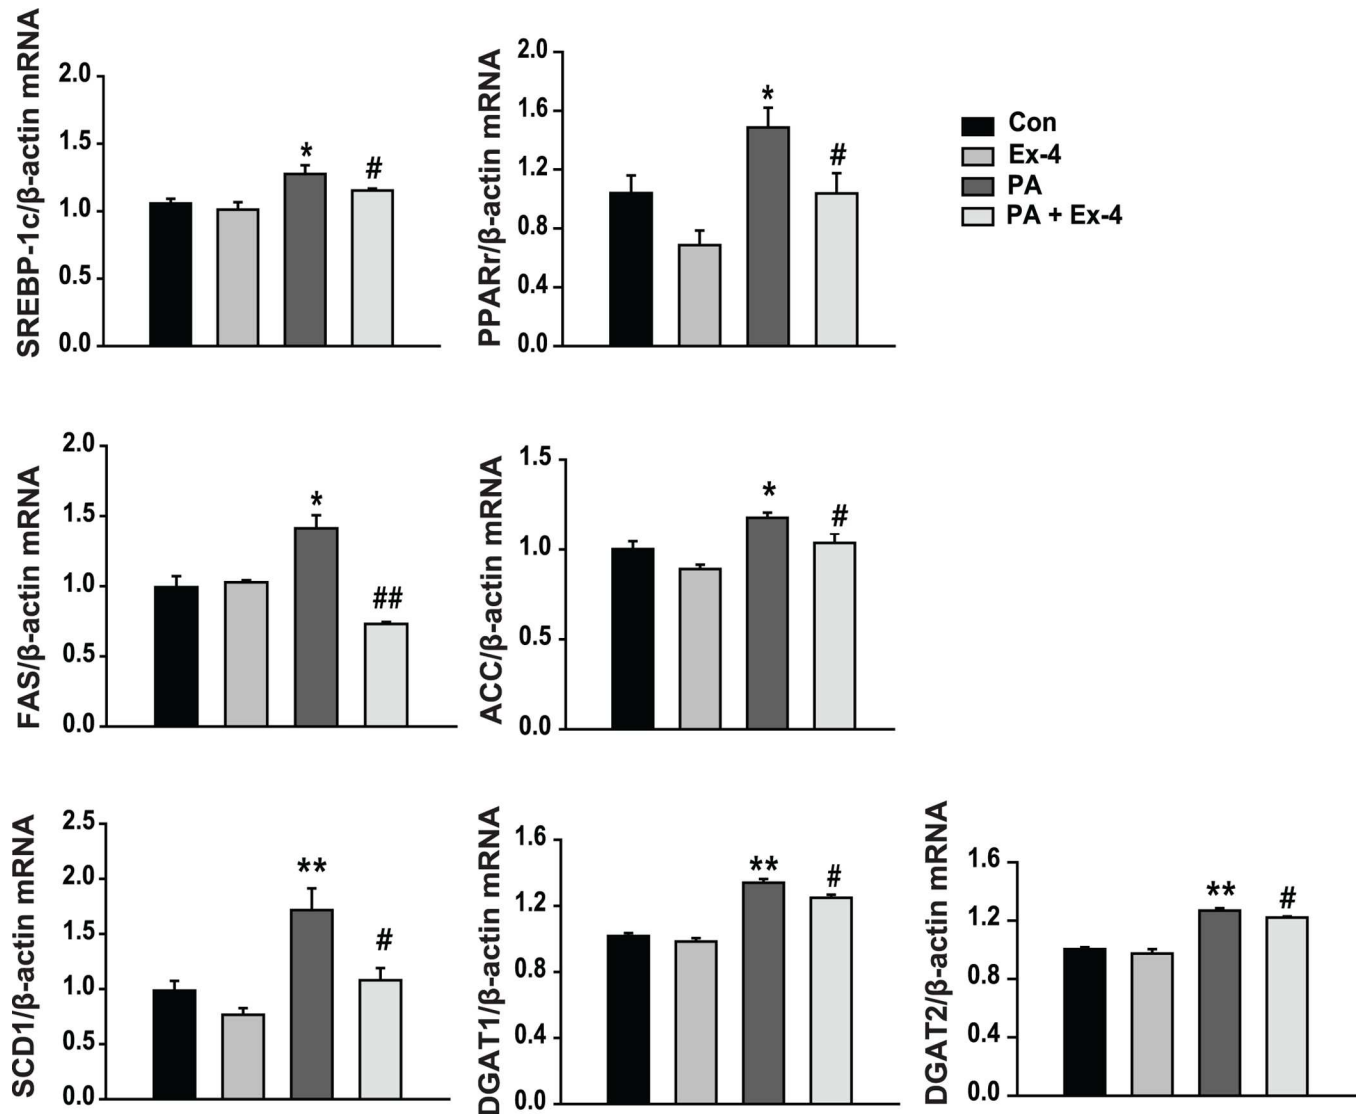

**Fig 2. Exendin-4 inhibits palmitic acid-induced hepatic lipogenesis and TG synthesis.** HepG2 cells were treated with palmitic acid (PA; 400  $\mu$ M) either with or without exendin-4 (Ex-4; 100 nM) for 24 hours. The mRNA expression levels of SREBP-1c, PPAR $\gamma$ , SCD1, FAS, ACC, DGAT1, and DGAT2 were normalized to the level of  $\beta$ -actin. All values are expressed as the mean  $\pm$  SE (n = 6). \* p<0.05, \*\* p<0.01 compared with control cells; # p<0.05, ## p<0.01 compared with PA-treated cells.

doi:10.1371/journal.pone.0166913.g002

inhibitor IWR-1, this effect of exendin-4 was not observed. Also, total triglyceride levels were consistent with lipid content quantified by oil red o staining (Fig 6B). These results suggest that the protective effect of exendin-4 against PA-induced lipid accumulation is mediated by  $\beta$ -catenin.

## Discussion

Exendin-4 has been reported to reduce lipid accumulation in the liver of a mouse model of HF-induced obesity and to improve hepatic lipid metabolism via the sirt1 signaling cascade [20]. In this study, we demonstrated that exendin-4 attenuates hepatic lipogenesis by activating  $\beta$ -catenin. Exendin-4 decreased the expression levels of hepatic SREBP-1 and PPAR $\gamma$  in PA-treated HepG2 cells. Increased expression levels of phospho-GSK-3 $\beta$ ,  $\beta$ -catenin and TCF4

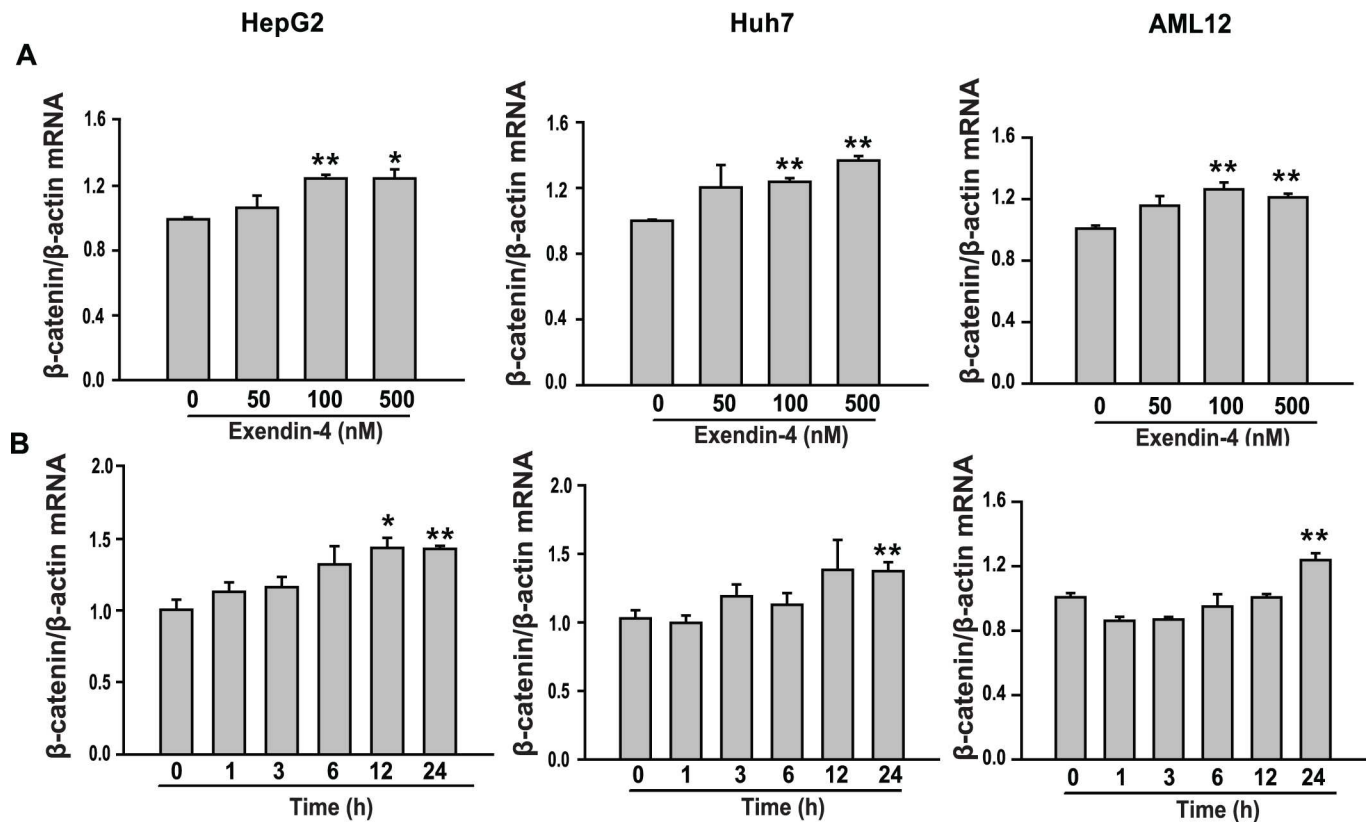

**Fig 3. Dose-dependent and time-dependent effects of exendin-4 on  $\beta$ -catenin expression in hepatocytes.** (A) HepG2, Huh7 and AML12 cells were treated with three different concentrations (50–500 nM) of exendin-4 for 24 hours. (B) HepG2, Huh7 and AML12 cells were treated with 100 nM exendin-4 for different lengths of time up to 24 hours.  $\beta$ -catenin expression was measured using quantitative (real-time) PCR and normalized to  $\beta$ -actin as a control. All values are expressed as the mean  $\pm$  SE (n = 6). \*  $p < 0.05$ , \*\*  $p < 0.01$  compared with control cells.

doi:10.1371/journal.pone.0166913.g003

induced by exendin-4 treatment were observed in an *in vitro* model of steatosis. However, siRNA-mediated knockdown of  $\beta$ -catenin increased the expression of lipogenic transcription factors and the effect of exendin-4 on PA-induced lipid accumulation was impaired upon treatment with the  $\beta$ -catenin inhibitor IWR-1. These findings suggest that the protective effect of exendin-4 against hepatic lipogenesis is mediated by the Wnt/ $\beta$ -catenin signaling pathway (Fig 7).

Hepatic steatosis is associated with the alteration of nuclear receptors, membrane transport proteins, and cellular enzymes [21]. Hepatic steatosis also includes the *de novo* synthesis of fatty acids from acetyl-CoA or malonyl-CoA, which are further metabolized to TAGs [22]. Fatty acid synthesis is catalyzed by acetyl-coA carboxylase (ACC) and fatty acid synthase (FAS). These enzymes are upregulated by SREBP-1c, lipogenic transcription factor [9,22]. In addition, PPAR $\gamma$ , a lipid-activated transcription factor, is also involved in lipid metabolism and glucose homeostasis [23]. In clinical and animal studies, rosiglitazone and pioglitazone, two PPAR $\gamma$ -selective agonists, have been reported to improve NAFLD and insulin resistance [24,25]. Inoue *et al.* reported that PPAR $\gamma$  expression is increased in the liver by high fat diet in mice [26]. In our previous study, we found that PA induces the nuclear translocation of SREBP-1 [27]. Also, the present study demonstrated that PA increases the expression levels of lipogenic genes, such as SREBP-1, PPAR $\gamma$ , SCD1, FAS, and ACC and fatty acid esterification genes, such as DGAT1 and DGAT2 in human hepatocytes. This finding suggests that PA

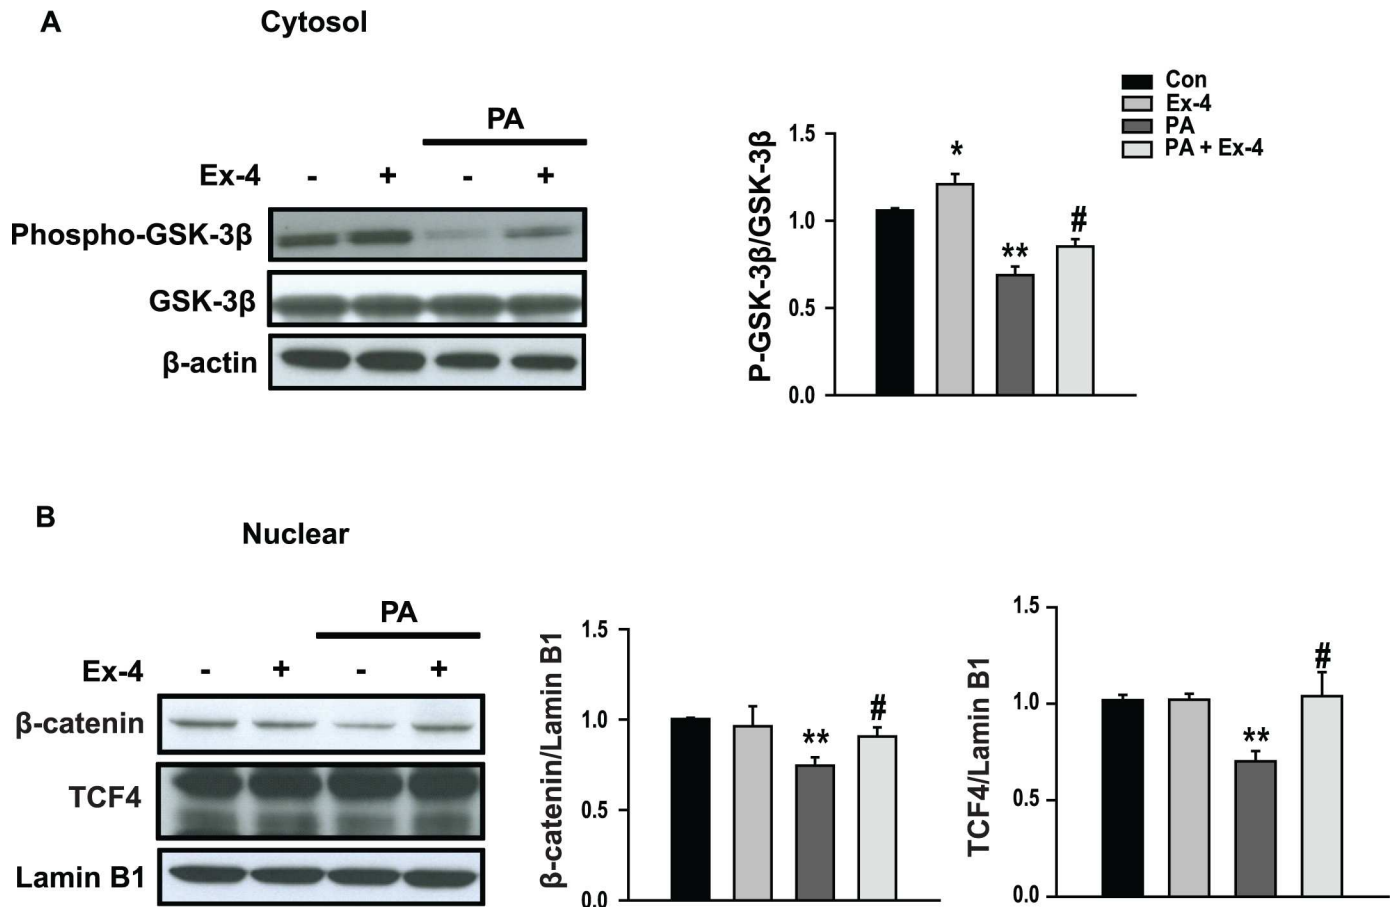

**Fig 4. Exendin-4 induces active  $\beta$ -catenin signaling in an *in vitro* model of steatosis.** Cytosolic and nuclear extracts were prepared from HepG2 cells treated with palmitic acid (PA; 400  $\mu$ M) either with or without exendin-4 (Ex-4; 100 nM) for 24 hours. The levels of (A) cytosolic phosphorylated GSK-3 $\beta$ , (B) nuclear  $\beta$ -catenin and TCF4 were analyzed by western blotting. All values are expressed as the mean  $\pm$  SE (n = 6). \* p<0.05, \*\* p<0.01 compared with control cells; # p<0.05, ## p<0.01 compared with PA-treated cells.

doi:10.1371/journal.pone.0166913.g004

induces hepatic steatosis by upregulating the expression of lipogenesis and fatty acid esterification-involved genes.

$\beta$ -catenin is a key protein in the canonical Wnt signaling cascade [28]. In the absence of Wnts, cytoplasmic  $\beta$ -catenin is recruited to a degradation complex containing GSK-3 $\beta$  and adenomatous polyposis coli (APC). This recruitment is followed by  $\beta$ -catenin phosphorylation, ubiquitination, and degradation. Alternatively, Wnt binding to frizzled (FZD) receptors and LRP5/6 coreceptors results in destabilization of this degradation complex, leading to phosphorylation/inactivation of GSK-3 $\beta$  and thus the accumulation of cytosolic  $\beta$ -catenin. Accumulated  $\beta$ -catenin translocates to the nucleus, where it binds to TCF/LEF transcription factors to activate the transcription of Wnt-responsive genes involved in cell proliferation and differentiation [29]. Various studies have demonstrated an association of TCF7L2 variants with features of metabolic syndrome, including elevated systolic and diastolic blood pressure, increased triglyceride levels, and elevated uric acid [30,31]. Recently, the activation of Wnt/ $\beta$ -catenin signaling in skeletal muscle cells was reported to improve insulin sensitivity by decreasing intramyocellular lipid deposition via downregulation of SREBP-1c [19]. In the present study, we demonstrated that the expression levels of nuclear  $\beta$ -catenin and TCF4, the latter of which is a main transcriptional regulator of Wnt signaling, were decreased in an *in*



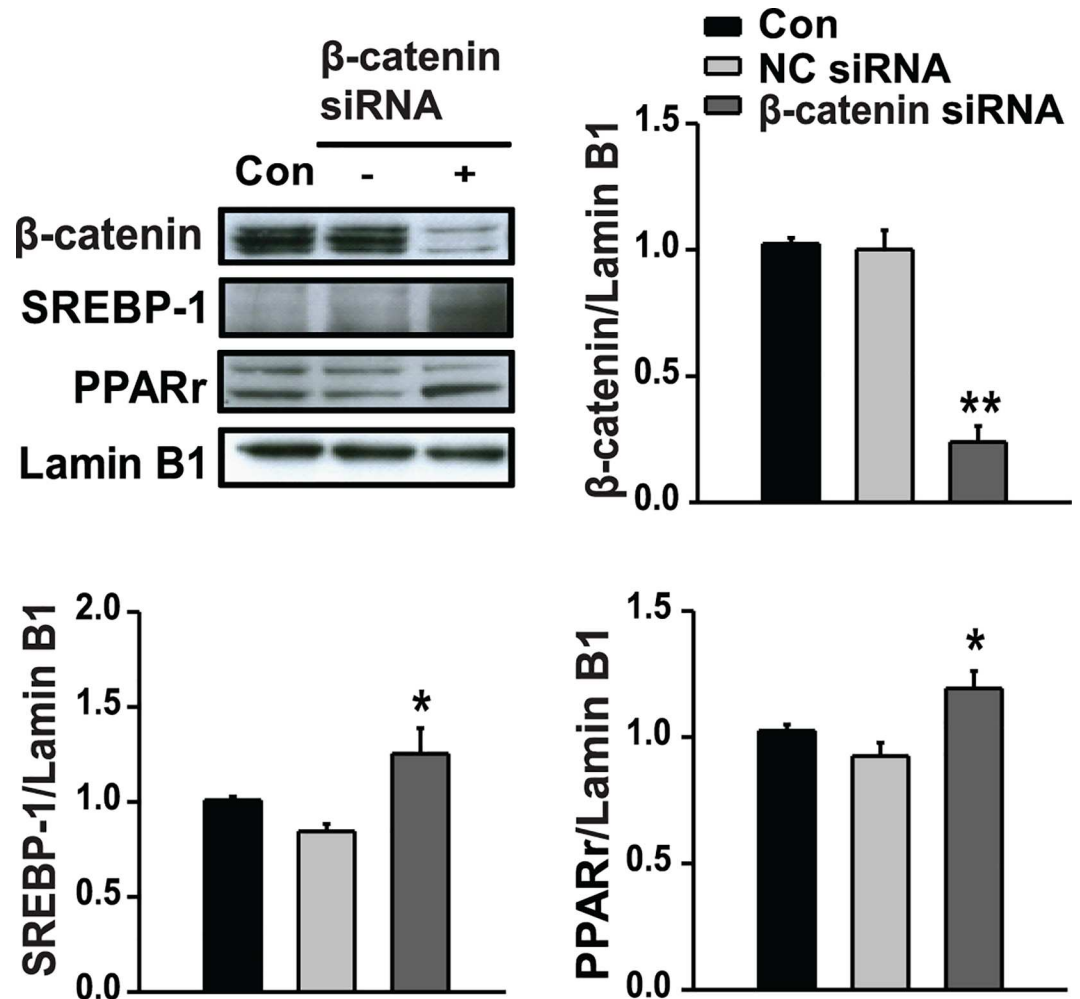

**Fig 5.  $\beta$ -catenin downregulates the expression of lipogenic transcription factors.** HepG2 cells were transfected with 10 nM siRNA directed against  $\beta$ -catenin for 24 hours. The protein levels of nuclear  $\beta$ -catenin, SREBP-1, and PPAR $\gamma$  were detected by western blot analysis. All values are expressed as the mean  $\pm$  SE (n = 6). \* p<0.05, \*\* p<0.01 compared with negative control (NC) siRNA-transfected cells.

doi:10.1371/journal.pone.0166913.g005

*vitro* model of hepatic steatosis. This finding suggests that Wnt signaling could be involved in the regulation of hepatic lipid metabolism.

GLP-1 agonists play important roles in diverse metabolic pathways in hepatocytes, including lipid metabolism, carbohydrate metabolism, and glucose homeostasis [5]. GLP-1 has been reported to regulate Wnt signaling in the pancreas and skeletal muscle [19]. Another study using mouse pancreatic islets found that GLP-1 agonists activated TCF7L2-dependent Wnt signaling by binding to GLP-1 receptor [31]. Moreover, inhibition of Wnt signaling by siRNA-mediated silencing of  $\beta$ -catenin or by the expression of a dominant negative version of TCF7L2 has been shown to decrease both basal and exendin-4-induced  $\beta$ -cell proliferation [31]. We found that the expression levels of  $\beta$ -catenin and TCF4 in exendin-4-treated hepatocytes were increased, and that the effect of exendin-4 on  $\beta$ -catenin expression was impaired upon treatment with the  $\beta$ -catenin inhibitor IWR-1 (S2 Fig). In addition, the blunted effects of exendin-4 in the regulation of lipid accumulation and in the expression of lipogenic genes were observed in hepatocytes treated with IWR-1 (S2 Fig). These data suggest that the

A

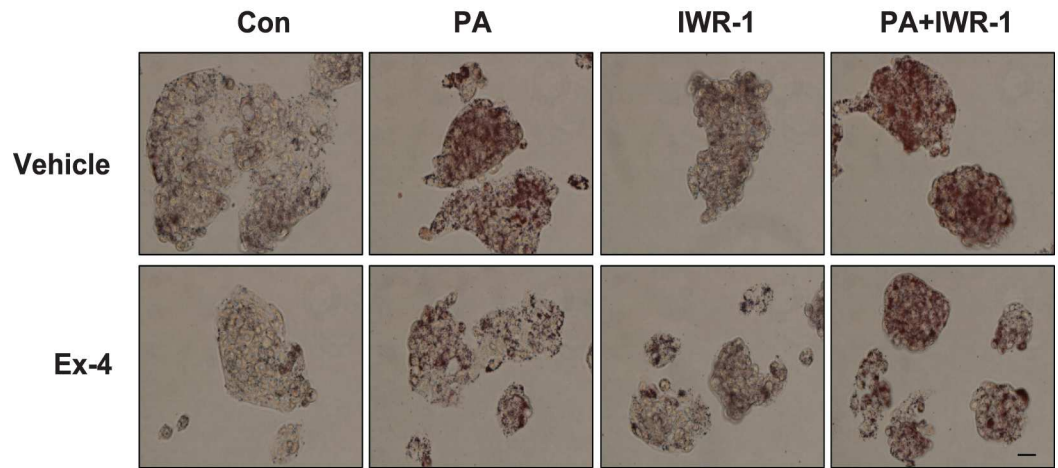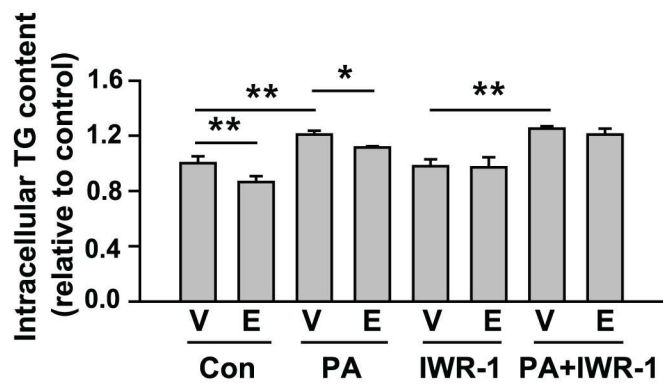

B

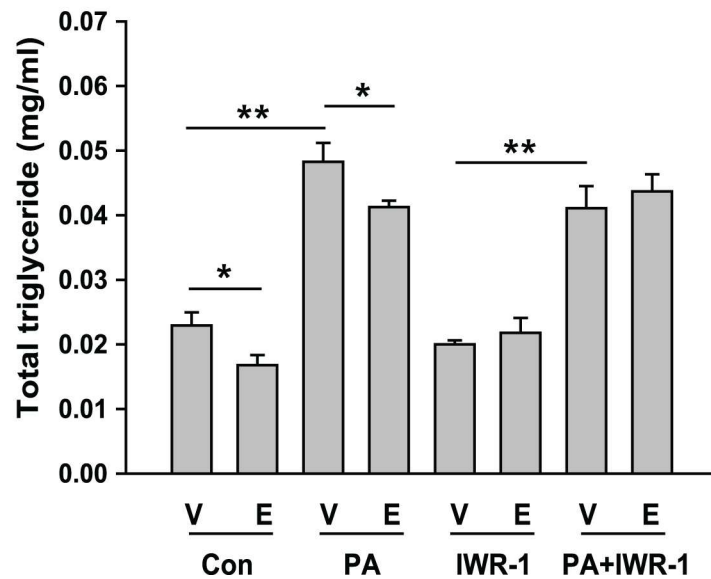

**Fig 6. Exendin-4 reduces PA-induced lipid accumulation via  $\beta$ -catenin signaling in HepG2 cells.** Cells treated with 400  $\mu$ M PA were stimulated with 100 nM exendin-4 in the absence or presence of 10  $\mu$ M IWR-1 for 24

hours. (A) Cells were stained with Oil Red O and images were captured under a light microscope (magnification, 400x). Scale bars = 100  $\mu$ m. The absorbance of the extracted dye was measured at 540 nm. (B) Triglycerides were extracted from cultured cells and quantitated by enzymatic assays. Triglyceride levels were normalized to total cellular protein contents. All values are expressed as the mean  $\pm$  SE (n = 6). \* p<0.05, \*\* p<0.01 compared with control cells.

doi:10.1371/journal.pone.0166913.g006

protective effects of exendin-4 on hepatic lipid accumulation could be mediated by  $\beta$ -catenin. However, further studies are needed to clarify the precise role of Wnt/ $\beta$ -catenin signaling in hepatic lipogenesis and the mechanism of exendin-4-mediated regulation of  $\beta$ -catenin. Additionally, our study did have a few limitations. HepG2 cell lines are available for mechanism-based testing of drug-induced hepatotoxicity including steatosis, cholestasis, and necrosis. Nevertheless, since our in vitro model was a cancer cell line, additional studies in normal hepatocytes are required.

In conclusion, the present study demonstrated that exendin-4 increases the expression of  $\beta$ -catenin and that inhibition of  $\beta$ -catenin increases the expression of lipogenic transcription factors. Therefore, exendin-4 may inhibit hepatic lipogenesis by activating the Wnt/ $\beta$ -catenin pathway, thus having a potentially beneficial role as a medical treatment for fatty liver disease.

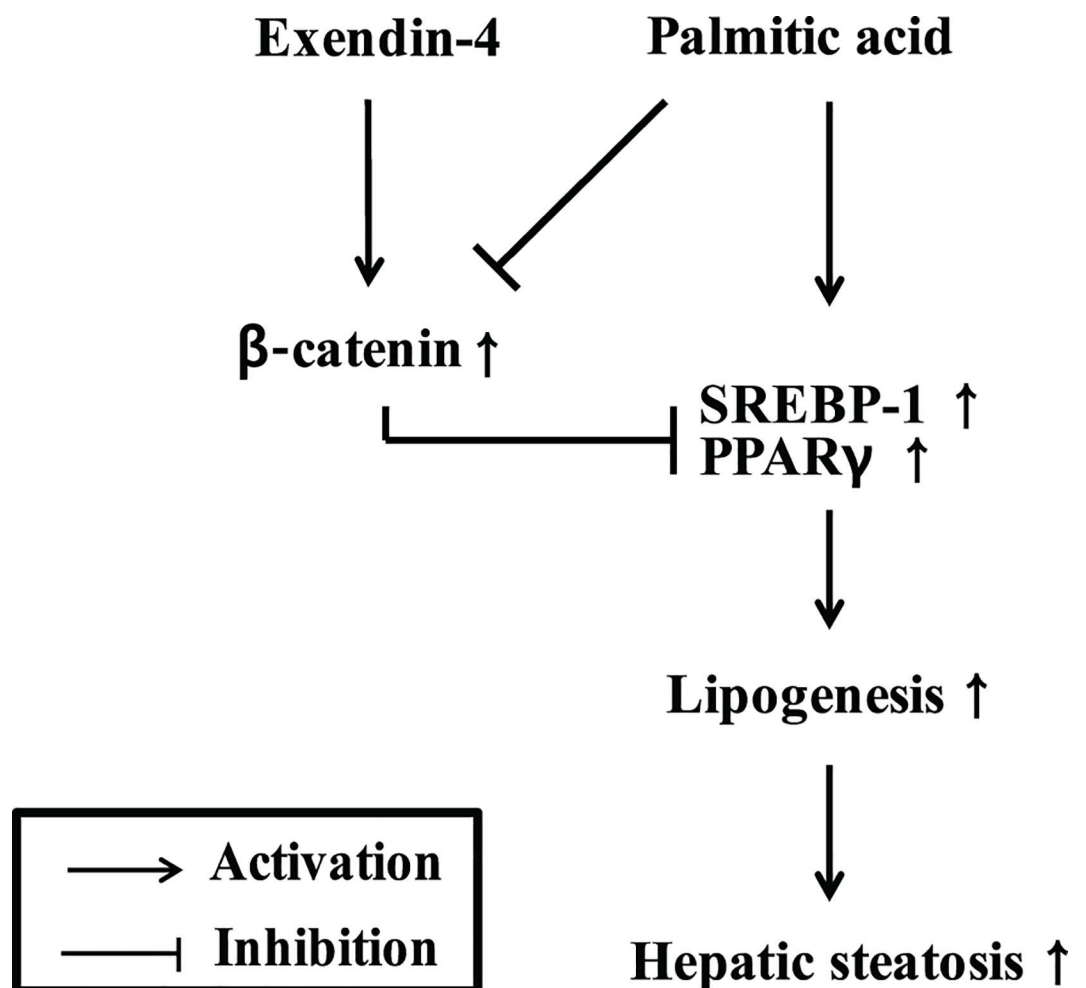

**Fig 7. Schematic diagram illustrating a possible mechanism by which exendin-4-driven  $\beta$ -catenin signaling alleviates PA-induced hepatic steatosis.**

doi:10.1371/journal.pone.0166913.g007

## Supporting Information

**S1 Fig. Exendin-4 induces active  $\beta$ -catenin signaling in AML12 cells.**

(EPS)

**S2 Fig. IWR-1 attenuates the effect of exendin-4 on the expression of  $\beta$ -catenin and lipogenic genes in HepG2 cells.**

(EPS)

## Author Contributions

**Conceptualization:** MHS JL SWH WYL.

**Data curation:** MHS JL SWH SEP EJR CYP KWO SWP WYL.

**Formal analysis:** MHS JL SWH.

**Funding acquisition:** SWH WYL.

**Investigation:** MHS JL.

**Methodology:** MHS JL SWH WYL.

**Project administration:** MHS JL SWH WYL.

**Resources:** MHS JL SWH EJR WY.

**Software:** MHS JL.

**Supervision:** SEP EJR CYP KWO SWP WYL.

**Visualization:** MHS JL SWH.

**Writing – original draft:** MHS JL EJR WYL.

**Writing – review & editing:** MHS JL SWH WYL.

## References

1. Tessari P, Coracina A, Cosma A, Tiengo A. Hepatic lipid metabolism and non-alcoholic fatty liver disease. *Nutr Metab Cardiovasc Dis* 2009; 19 (4): 291–302. Epub 2009/04/11. doi: [10.1016/j.numecd.2008.12.015](https://doi.org/10.1016/j.numecd.2008.12.015) PMID: [19359149](https://pubmed.ncbi.nlm.nih.gov/19359149/)
2. Neuschwander-Tetri BA. Hepatic lipotoxicity and the pathogenesis of nonalcoholic steatohepatitis: the central role of nontriglyceride fatty acid metabolites. *Hepatology* 2010; 52 (2): 774–788. Epub 2010/08/05. doi: [10.1002/hep.23719](https://doi.org/10.1002/hep.23719) PMID: [20683968](https://pubmed.ncbi.nlm.nih.gov/20683968/)
3. Fofelle F, Ferre P. New perspectives in the regulation of hepatic glycolytic and lipogenic genes by insulin and glucose: a role for the transcription factor sterol regulatory element binding protein-1c. *Biochem J* 2002; 366 (Pt 2): 377–391. Epub 2002/06/14. doi: [10.1042/BJ20020430](https://doi.org/10.1042/BJ20020430) PMID: [12061893](https://pubmed.ncbi.nlm.nih.gov/12061893/)
4. Cho YM, Wideman RD, Kieffer TJ. Clinical application of glucagon-like Peptide 1 receptor agonists for the treatment of type 2 diabetes mellitus. *Endocrinol Metab (Seoul)* 2013; 28 (4): 262–274. Epub 2014/01/08.
5. Lee J, Hong SW, Rhee EJ, Lee WY. GLP-1 Receptor Agonist and Non-Alcoholic Fatty Liver Disease. *Diabetes Metab J* 2012; 36 (4): 262–267. Epub 2012/09/06. doi: [10.4093/dmj.2012.36.4.262](https://doi.org/10.4093/dmj.2012.36.4.262) PMID: [22950055](https://pubmed.ncbi.nlm.nih.gov/22950055/)
6. Kim HY, Hwang JI, Moon MJ, Seong JY. A Novel Long-Acting Glucagon-Like Peptide-1 Agonist with Improved Efficacy in Insulin Secretion and beta-Cell Growth. *Endocrinol Metab (Seoul)* 2014; 29 (3): 320–327. Epub 2014/10/14.
7. Gupta NA, Mells J, Dunham RM, Grakoui A, Handy J, Saxena NK, et al. Glucagon-like peptide-1 receptor is present on human hepatocytes and has a direct role in decreasing hepatic steatosis in vitro by modulating elements of the insulin signaling pathway. *Hepatology* 2010; 51 (5): 1584–1592. Epub 2010/03/13. doi: [10.1002/hep.23569](https://doi.org/10.1002/hep.23569) PMID: [20225248](https://pubmed.ncbi.nlm.nih.gov/20225248/)

8. Ding X, Saxena NK, Lin S, Gupta NA, Anania FA. Exendin-4, a glucagon-like protein-1 (GLP-1) receptor agonist, reverses hepatic steatosis in ob/ob mice. *Hepatology* 2006; 43 (1): 173–181. Epub 2005/12/24. doi: [10.1002/hep.21006](https://doi.org/10.1002/hep.21006) PMID: [16374859](https://pubmed.ncbi.nlm.nih.gov/16374859/)
9. Ferre P, Foufelle F. Hepatic steatosis: a role for de novo lipogenesis and the transcription factor SREBP-1c. *Diabetes Obes Metab* 2010; 12 Suppl 2: 83–92. Epub 2010/11/05.
10. Lee J, Hong SW, Park SE, Rhee EJ, Park CY, Oh KW, et al. Exendin-4 regulates lipid metabolism and fibroblast growth factor 21 in hepatic steatosis. *Metabolism* 2014; 63 (8): 1041–1048. Epub 2014/06/17. doi: [10.1016/j.metabol.2014.04.011](https://doi.org/10.1016/j.metabol.2014.04.011) PMID: [24933399](https://pubmed.ncbi.nlm.nih.gov/24933399/)
11. Prestwich TC, Macdougald OA. Wnt/beta-catenin signaling in adipogenesis and metabolism. *Curr Opin Cell Biol* 2007; 19 (6): 612–617. Epub 2007/11/13. doi: [10.1016/j.ceb.2007.09.014](https://doi.org/10.1016/j.ceb.2007.09.014) PMID: [17997088](https://pubmed.ncbi.nlm.nih.gov/17997088/)
12. Christodoulides C, Lagathu C, Sethi JK, Vidal-Puig A. Adipogenesis and WNT signalling. *Trends Endocrinol Metab* 2009; 20 (1): 16–24. Epub 2008/11/15. doi: [10.1016/j.tem.2008.09.002](https://doi.org/10.1016/j.tem.2008.09.002) PMID: [19008118](https://pubmed.ncbi.nlm.nih.gov/19008118/)
13. Welters HJ, Kulkarni RN. Wnt signaling: relevance to beta-cell biology and diabetes. *Trends Endocrinol Metab* 2008; 19 (10): 349–355. Epub 2008/10/18. doi: [10.1016/j.tem.2008.08.004](https://doi.org/10.1016/j.tem.2008.08.004) PMID: [18926717](https://pubmed.ncbi.nlm.nih.gov/18926717/)
14. MacDonald BT, Tamai K, He X. Wnt/beta-catenin signaling: components, mechanisms, and diseases. *Dev Cell* 2009; 17 (1): 9–26. Epub 2009/07/22. doi: [10.1016/j.devcel.2009.06.016](https://doi.org/10.1016/j.devcel.2009.06.016) PMID: [19619488](https://pubmed.ncbi.nlm.nih.gov/19619488/)
15. Kawai M, Mushiaki S, Bessho K, Murakami M, Namba N, Kokubu C, et al. Wnt/Lrp/beta-catenin signaling suppresses adipogenesis by inhibiting mutual activation of PPARgamma and C/EBPalpha. *Biochem Biophys Res Commun* 2007; 363 (2): 276–282. Epub 2007/09/25. doi: [10.1016/j.bbrc.2007.08.088](https://doi.org/10.1016/j.bbrc.2007.08.088) PMID: [17888405](https://pubmed.ncbi.nlm.nih.gov/17888405/)
16. Kanazawa A, Tsukada S, Sekine A, Tsunoda T, Takahashi A, Kashiwagi A, et al. Association of the gene encoding wingless-type mammary tumor virus integration-site family member 5B (WNT5B) with type 2 diabetes. *Am J Hum Genet* 2004; 75 (5): 832–843. Epub 2004/09/24. doi: [10.1086/425340](https://doi.org/10.1086/425340) PMID: [15386214](https://pubmed.ncbi.nlm.nih.gov/15386214/)
17. Grant SF, Thorleifsson G, Reynisdottir I, Benediktsson R, Manolescu A, Sainz J, et al. Variant of transcription factor 7-like 2 (TCF7L2) gene confers risk of type 2 diabetes. *Nat Genet* 2006; 38 (3): 320–323. Epub 2006/01/18. doi: [10.1038/ng1732](https://doi.org/10.1038/ng1732) PMID: [16415884](https://pubmed.ncbi.nlm.nih.gov/16415884/)
18. Liu Z, Habener JF. Glucagon-like peptide-1 activation of TCF7L2-dependent Wnt signaling enhances pancreatic beta cell proliferation. *J Biol Chem* 2008; 283 (13): 8723–8735. Epub 2008/01/25. doi: [10.1074/jbc.M706105200](https://doi.org/10.1074/jbc.M706105200) PMID: [18216022](https://pubmed.ncbi.nlm.nih.gov/18216022/)
19. Abiola M, Favier M, Christodoulou-Vafeiadou E, Pichard AL, Martelly I, Guillet-Deniau I. Activation of Wnt/beta-catenin signaling increases insulin sensitivity through a reciprocal regulation of Wnt10b and SREBP-1c in skeletal muscle cells. *PLoS one* 2009; 4 (12): e8509. Epub 2009/12/31. doi: [10.1371/journal.pone.0008509](https://doi.org/10.1371/journal.pone.0008509) PMID: [20041157](https://pubmed.ncbi.nlm.nih.gov/20041157/)
20. Lee J, Hong SW, Chae SW, Kim DH, Choi JH, Bae JC, et al. Exendin-4 improves steatohepatitis by increasing Sirt1 expression in high-fat diet-induced obese C57BL/6J mice. *PLoS one* 2012; 7 (2): e31394. Epub doi: [10.1371/journal.pone.0031394](https://doi.org/10.1371/journal.pone.0031394) PMID: [22363625](https://pubmed.ncbi.nlm.nih.gov/22363625/)
21. Postic C, Girard J. The role of the lipogenic pathway in the development of hepatic steatosis. *Diabetes Metab* 2008; 34 (6 Pt 2): 643–648. Epub 2009/02/07.
22. Postic C, Girard J. Contribution of de novo fatty acid synthesis to hepatic steatosis and insulin resistance: lessons from genetically engineered mice. *J Clin Invest* 2008; 118 (3): 829–838. Epub 2008/03/05. doi: [10.1172/JCI34275](https://doi.org/10.1172/JCI34275) PMID: [18317565](https://pubmed.ncbi.nlm.nih.gov/18317565/)
23. Gurnell M. PPARgamma and metabolism: insights from the study of human genetic variants. *Clin Endocrinol (Oxf)* 2003; 59 (3): 267–277. Epub 2003/08/16.
24. Wang CH, Leung CH, Liu SC, Chung CH. Safety and effectiveness of rosiglitazone in type 2 diabetes patients with nonalcoholic fatty liver disease. *J Formos Med Assoc* 2006; 105 (9): 743–752. Epub 2006/09/09. doi: [10.1016/S0929-6646\(09\)60202-3](https://doi.org/10.1016/S0929-6646(09)60202-3) PMID: [16959622](https://pubmed.ncbi.nlm.nih.gov/16959622/)
25. Kallwitz ER, McLachlan A, Cotler SJ. Role of peroxisome proliferators-activated receptors in the pathogenesis and treatment of nonalcoholic fatty liver disease. *World J Gastroenterol* 2008; 14 (1): 22–28. Epub 2008/01/08. doi: [10.3748/wjg.14.22](https://doi.org/10.3748/wjg.14.22) PMID: [18176957](https://pubmed.ncbi.nlm.nih.gov/18176957/)
26. Inoue M, Ohtake T, Motomura W, Takahashi N, Hosoki Y, Miyoshi S, et al. Increased expression of PPARgamma in high fat diet-induced liver steatosis in mice. *Biochem Biophys Res Commun* 2005; 336 (1): 215–222. Epub 2005/08/30. doi: [10.1016/j.bbrc.2005.08.070](https://doi.org/10.1016/j.bbrc.2005.08.070) PMID: [16125673](https://pubmed.ncbi.nlm.nih.gov/16125673/)
27. Hong SW, Lee J, Park SE, Rhee EJ, Park CY, Oh KW, et al. Repression of sterol regulatory element-binding protein 1-c is involved in the protective effects of exendin-4 in pancreatic beta-cell line. *Mol Cell Endocrinol* 2012; 362 (1–2): 242–252. Epub 2012/07/24. doi: [10.1016/j.mce.2012.07.004](https://doi.org/10.1016/j.mce.2012.07.004) PMID: [22820130](https://pubmed.ncbi.nlm.nih.gov/22820130/)

28. Logan CY, Nusse R. The Wnt signaling pathway in development and disease. *Annu Rev Cell Dev Biol* 2004; 20: 781–810. Epub 2004/10/12. doi: [10.1146/annurev.cellbio.20.010403.113126](https://doi.org/10.1146/annurev.cellbio.20.010403.113126) PMID: [15473860](https://pubmed.ncbi.nlm.nih.gov/15473860/)
29. Reya T, Clevers H. Wnt signalling in stem cells and cancer. *Nature* 2005; 434 (7035): 843–850. Epub 2005/04/15. doi: [10.1038/nature03319](https://doi.org/10.1038/nature03319) PMID: [15829953](https://pubmed.ncbi.nlm.nih.gov/15829953/)
30. Cauchi S, Froguel P. TCF7L2 genetic defect and type 2 diabetes. *Curr Diab Rep* 2008; 8 (2): 149–155. Epub 2008/05/01. PMID: [18445358](https://pubmed.ncbi.nlm.nih.gov/18445358/)
31. Liu PH, Chang YC, Jiang YD, Chen WJ, Chang TJ, Kuo SS, et al. Genetic variants of TCF7L2 are associated with insulin resistance and related metabolic phenotypes in Taiwanese adolescents and Caucasian young adults. *J Clin Endocrinol Metab* 2009; 94 (9): 3575–3582. Epub 2009/06/11. doi: [10.1210/jc.2009-0609](https://doi.org/10.1210/jc.2009-0609) PMID: [19509102](https://pubmed.ncbi.nlm.nih.gov/19509102/)
